# Supplementary material for: Identification and replication of RNA-Seq gene network modules associated with depression severity
Source: PubMed Central journal article supplement (PMC6125582; doi:10.1038/s41398-018-0234-3), 2018-09-05
Supplement: 41398_2018_234_MOESM1_ESM.pdf [file 41398_2018_234_MOESM1_ESM.pdf]

## Supplementary materials

**“Identification and replication of RNA-Seq gene network modules associated with depression severity” by Trang Le et al.**

### **Supplement 1. RNA-Seq data generation**

Morning blood samples were obtained from the participants, and peripheral blood mononuclear cells (PBMC) were isolated using cell preparation tubes. Then, we quantified RNA expression by analyzing complementary DNA derived from the PBMCs with RNA-Seq. RNA was obtained from frozen peripheral blood mononuclear cells (Inflammation and neurological disease-related genes are differentially expressed in depressed patients with mood disorders and correlate with morphometric and functional imaging abnormalities) using Qiagen (Hilden, Germany) Qias shredder columns to homogenize the cell lysates coupled with and Qiagen RNeasy Mini Kits (Hilden, Germany) for total RNA extraction. The RNA isolation procedure included a DNase digestion step as directed by the Qiagen protocol. RNA was frozen and shipped to the Oklahoma Medical Research Foundation (Oklahoma City, OK). Concentration of RNA was ascertained via fluorometric analysis on a Thermo Fisher Qubit fluorometer. Overall quality of RNA was verified using an Agilent TapeStation instrument. Following initial quality control steps, sequencing libraries were generated using the Illumina Truseq Stranded mRNA with library prep kit according to the manufacturers protocol. Briefly, mature mRNA was enriched for via pull down with beads coated with oligo-dT homopolymers. The mRNA molecules were then chemically fragmented and the first strand of cDNA was generated using random primers. Following RNase digestion the second strand of cDNA was generated replacing dTTP in the reaction mix with dUTP. Double stranded cDNA then underwent adenylation of 3' ends following ligation of Illumina-specific adapter sequences. Subsequent PCR enrichment of ligated products further selected for those strands not

incorporating dUTP, leading to strand-specific sequencing libraries. Final libraries for each sample were assayed on the Agilent TapeStation for appropriate size and quantity. These libraries were then pooled in equimolar amounts as ascertained via fluorometric analyses. Final pools were absolutely quantified using qPCR on a Roche LightCycler 480 instrument with Kapa Biosystems Illumina Library Quantification reagents. Sequencing was performed on an Illumina HiSeq 3000 instrument with paired-end 150bp reads. Samples were sequenced to an average depth of 30 million reads and RNA Integrity Number of 8.6 per sample. RNA-Seq measures gene expression by sequencing, yielding the abundance of each transcript present. Gene transcripts were computed from transcriptomic sequencing using the MAP-RSeq bioinformatics pipeline tool<sup>1</sup>. The Illumina HiSeq 2000 (Illumina, San Diego, CA) sequencing reads were aligned to the human genome build 37.1 using TopHat (1.3.3) and Bowtie (0.12.7). Counting genes and mapping the reads to individual exons was carried by HTSeq (0.5.3p3) and BEDTools (2.7.1), respectively. The total number of read counts was obtained per gene from the mRNA expression. Quality control was graphically assessed pre- and post-normalization with minus- vs.- average and box-and-whisker plots. The GC content and gene length adjustments were also evaluated graphically. Normalization of the gene counts was performed with Conditional Quantile Normalization (CQN), which accounts for differences in library size and also adjusts for GC content and gene length<sup>2</sup>. These normalized values were used for subsequent analyses.

## Supplement 2. RNA-Seq data preprocessing

Preprocessing steps described below involved: i) removal of transcripts with low counts (threshold defined below) and normalization, ii) outlier detection, iii) batch effect correction, and iv) exclusion of transcripts of which coefficient of variation were larger than 0.8 in order to eliminate genes with inconsistent expression across samples.

*i) Low expression gene removal and normalization:* Removing low-expressed transcripts is a necessary step because low values can bias the results when certain types of statistical methods are employed<sup>3</sup>. We considered a gene to be reasonably expressed if, in at least 10% of the samples, its transcript had at least 2-7 reads, depending on the library size (e.g. the total number of raw counts in each sample). In other words, since the library size ranged from 220,667 to 675,792 counts, we removed genes with less than ten counts-per-million (CPM) mapped reads in more than 144 samples, where the CPM reads are computed as followed:

$$CPM = \frac{10^6 \times \text{raw counts}}{\text{library size}}$$

We then normalized the raw counts with trimmed mean of M-values (TMM)<sup>4</sup> to account for compositional difference between the libraries. TMM method estimates normalization factors between samples and produces relative expression levels across samples. After removing the low expressed genes and performing within- and between-library normalization, we computed a matrix of log<sub>2</sub> counts-per-million (logCPM) as a variance-stabilizing transformation of the current data set. These steps were performed using the “edgeR” Bioconductor package<sup>5</sup>.

*ii) Outlier detection:* We applied an angle-based outlier (ABO) detection<sup>6</sup> to remove samples with exceptionally small ABO factor. Instead of distances, this method compares the divergence of angles

between pairs of data points. ABO detection has shown to be robust in high dimensional data because it skips over distance, a measure whose contrast between nearest points and farthest points converges to 0 as the space's dimensionality increases<sup>7</sup>. Since ABO factors describe the variance in directions of one data point relative to the rest, data points with small ABO factors imply that the remaining data points are clustered in a specific direction and thus show themselves as potential outliers in the data set (Fig. S1).

*iii) Batch effect adjustment:* Since erroneous modules of genes can be generated if batch effects are not controlled<sup>8</sup>, we adjusted for the batch effect with the function “removeBatchEffect” from the R package “limma”<sup>9</sup> (Fig. S2). Nonetheless, as advised by Nygaard<sup>10</sup>, we still included batch as a covariate in our downstream regression models. We also note that although the data contain batch effects, the phenotypes were evenly distributed across batches (Figure S2). This balanced batch-phenotype configuration allows batch adjustment to remove most of the variance attributed to batch without affecting between-group variance and hence help increase statistical power<sup>10</sup>.

*iv) Highly varied expression values filtering:* Finally, prior to the network analysis, among transcripts that have significant counts in at least 16 samples, we excluded transcripts with coefficient of variation larger than 0.8 to obtain genes whose expression values were roughly consistent across samples. We reasoned that expression values that differ greatly across subjects are likely due to technical variability<sup>11</sup>. Filtering by coefficient of variation also helps increase power and prevent false discoveries, hence improves the number of differentially expressed genes in downstream identification analysis<sup>12</sup>.

**Supplement 3. Figure S1.** Angle based outlier (ABO) factors of 159 samples. In the high dimensional RNASeq data, potential outliers are shown in red, corresponding to data points with distinctly small ABO factors.

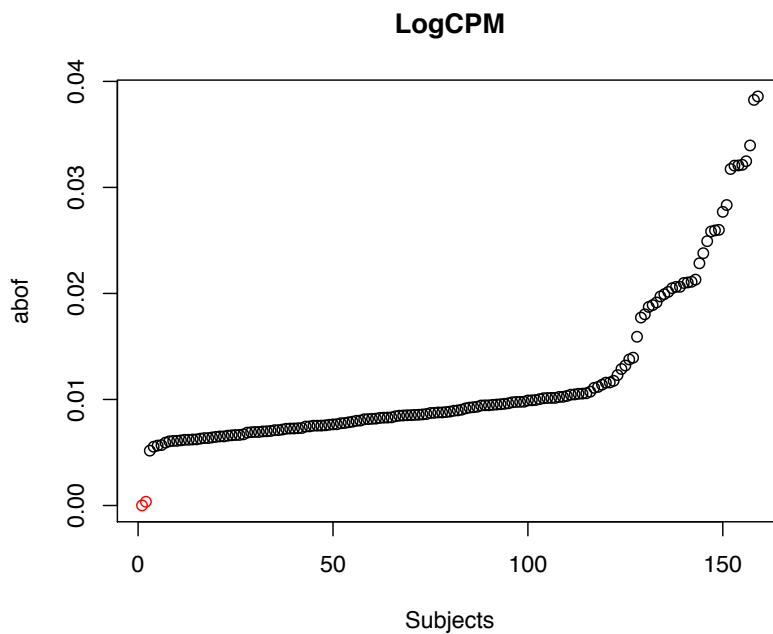

**Supplement 4. Figure S2.** Two groups of diagnoses equally represented in all batches. The vertical axis (count) represents the number of HC/MDD subjects in each batch.

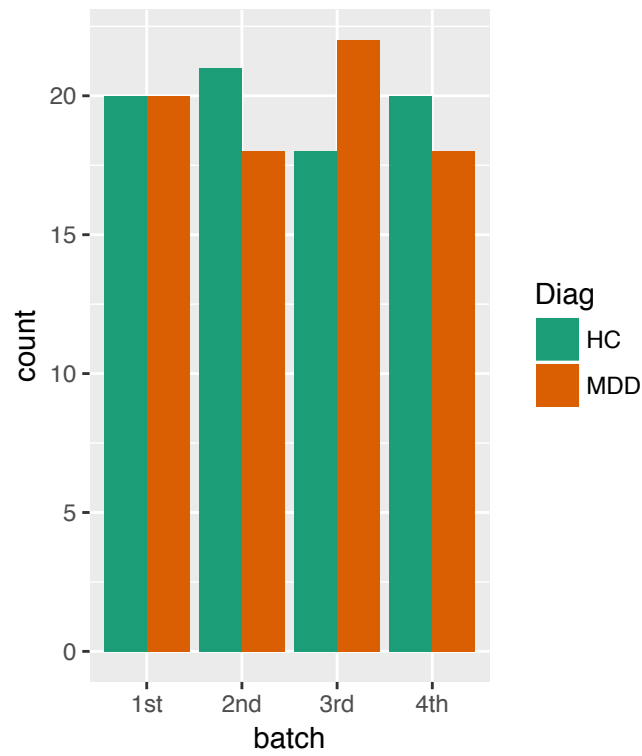

**Supplement 5. Figure S3.** Number of genes in each module.

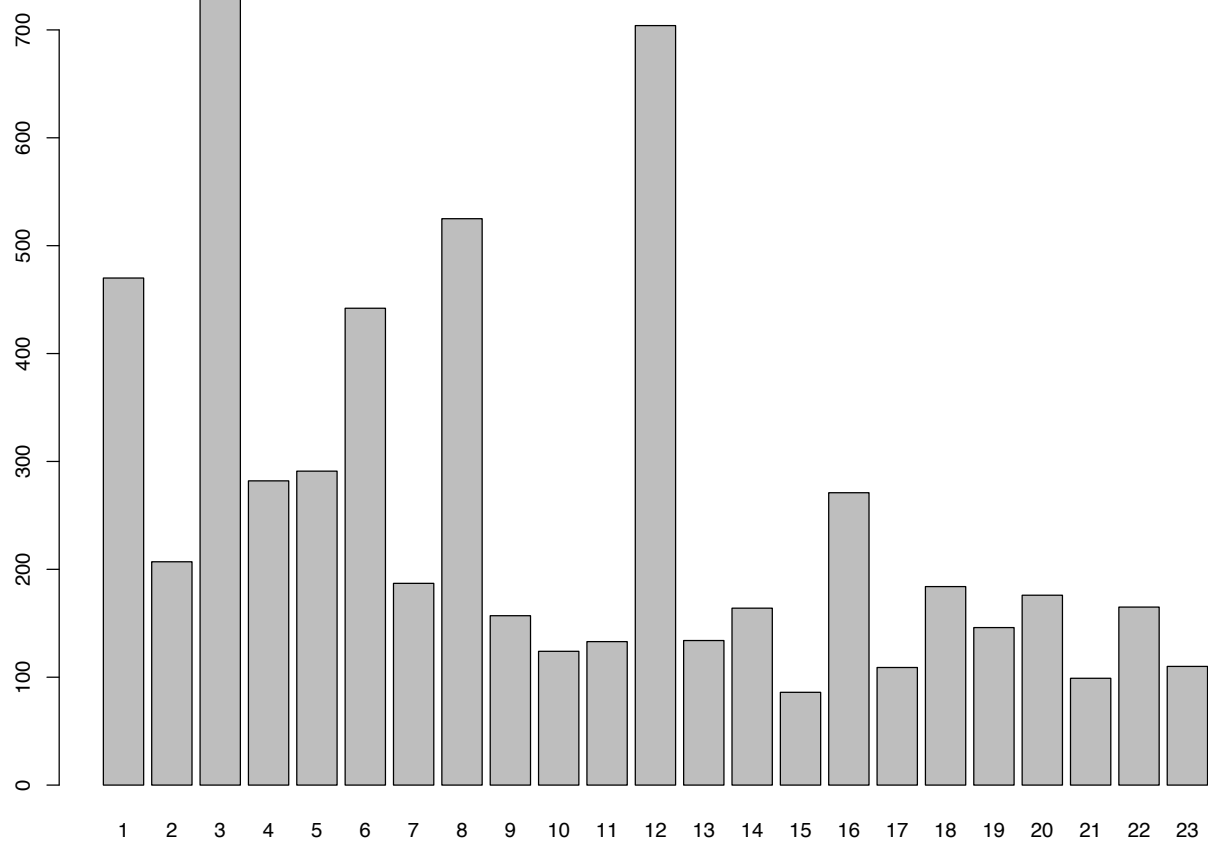

**Supplement 6. Figure S4.** The plot of the modules' composite importance associated with MADRS. At the false discovery rate threshold of 5%, DGM-17 and DGM-5 have significant association with depression severity.

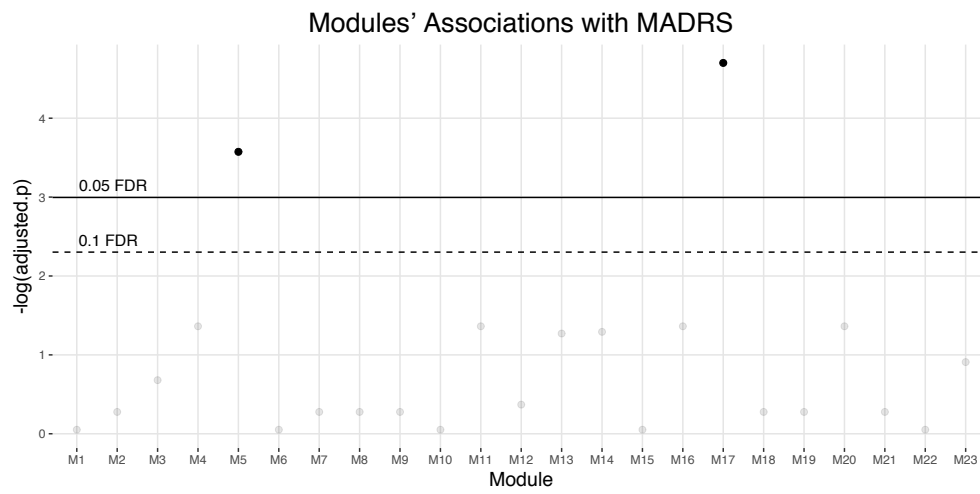



**Supplement 7. Gene list 1.** List of genes in module DGM-5.

|            |            |          |              |            |            |           |          |
|------------|------------|----------|--------------|------------|------------|-----------|----------|
| A2MP1      | CARD14     | EVA1C    | HEXIM1       | MASP2      | POLR2J4    | SENP1     | TUBB1    |
| AFAP1-AS1  | CCDC104    | EZR-AS1  | HLA-J        | MCC        | PP7080     | SIGLEC16  | TXLNA    |
| AKAP5      | CCDC181    | FAM103A1 | HMBBOX1      | MCM3AP-AS1 | PPARA      | SKIV2L    | TYW1     |
| AKT1       | CCT6P3     | FAM13A   | HSPB9        | MCTP1      | PPM1N      | SLAMF1    | UBE2E1   |
| ALG12      | CD160      | FAM160B2 | HSPD1        | MEGF11     | PPP1R3B    | SLC13A4   | UBTF     |
| ALOX12     | CD48       | FAM184B  | ICMT         | METTL25    | PPWD1      | SLC25A25  | UGDH-AS1 |
| ALS2CR12   | CD72       | FAM86HP  | INTS4L2      | MIR3661    | PRKX       | SLC26A2   | UHRF1    |
| AMPH       | CERS5      | FAM98B   | ITIH2        | MIR635     | PROX2      | SLC48A1   | USP34    |
| ANAPC15    | CFD        | FAS      | JAM3         | MLLT10P1   | PRPF3      | SNRPD2    | UTP14A   |
| ANXA6      | CLASRP     | FDPS     | JPX          | MMP19      | PRPF38A    | SNX21     | UTP20    |
| AQP11      | CLEC2B     | FKBP4    | KCNIP2-AS1   | MPL        | PSMD5      | SPAG4     | VN1R1    |
| ARAP1      | CNTRL      | FOCAD    | KDEL3        | MROH6      | PSMD7      | SPDYE5    | VPRBP    |
| ARHGAP27   | COA5       | FOXM1    | KMT2C        | MRS2       | PTPN14     | SPRN      | WARS2    |
| ARHGEF26   | COL4A4     | FOXP3    | KRTAP5-1     | MSL1       | PXK        | STX17     | WIPI1    |
| ATAD5      | COQ6       | FTSJ3    | LARS         | MSTO1      | RAB11B-AS1 | TAC4      | ZC3H8    |
| ATG14      | COX20      | FXR2     | LCA5L        | MYO19      | RAD17      | TACC1     | ZFP69    |
| ATP1A1-AS1 | CREB1      | GALNS    | LENG9        | MYO5B      | RASGEF1A   | TAF3      | ZNF37BP  |
| ATP2C2     | CRLF3      | GALNT10  | LGALS8       | NDUFA2     | RBM4B      | TBC1D8    | ZNF407   |
| ATP5H      | CUL4A      | GINS3    | LHX4         | NDUFAF2    | REEP5      | TCF7L1    | ZNF506   |
| B9D2       | DARS2      | GLE1     | LOC100129148 | NFE2L3     | REV3L      | TFIP11    | ZNF544   |
| BAD        | DCDC2B     | GNB4     | LOC100379224 | NFYC       | RHOQ       | TFPT      | ZNF546   |
| BCS1L      | DCLRE1C    | GNPTG    | LOC100996385 | NR2C2      | RNF113A    | THADA     | ZNF552   |
| BMP8A      | DDX56      | GOLGA8H  | LOC101241902 | NREP       | RNF139-AS1 | TM6SF1    | ZNF57    |
| BSN        | DENND4A    | GPM6B    | LOC101927275 | NT5C2      | RNF149     | TMEM131   | ZNF646   |
| BTBD2      | DHODH      | GPR137   | LOC101927901 | NUDT13     | RNF224     | TMEM139   | ZNF790   |
| C11orf42   | DNAH1      | GPR155   | LOC101928063 | NUDT5      | RNF39      | TMEM217   | ZNF805   |
| C11orf80   | DNAJC17    | GPR18    | LOC101929767 | OSGEPL1    | ROCK2      | TMEM221   | ZNF814   |
| C12orf73   | DNAJC9-AS1 | GRTP1    | LOC102723809 | OXR1       | RPRD1A     | TMEM259   | ZNF83    |
| C17orf53   | DOT1L      | GSE1     | LOC102723885 | PARD6G     | RPUSD3     | TMEM263   | ZNF865   |
| C19orf68   | DPP7       | GSTO1    | LOC102724246 | PCCA       | RRP7A      | TMPRSS9   | ZNF878   |
| C1orf146   | DRG1       | GTF2F1   | LOC646471    | PCGF3      | RUFY3      | TNFAIP8L1 | ZNHIT3   |
| C2orf88    | ECT2L      | GUCY1B2  | LOC729732    | PCP4L1     | RUSC1      | TNK1      | ZSWIM7   |
| C6orf136   | EFR3B      | GZF1     | LRP11        | PDE6C      | S100A1     | TP53I3    |          |
| C9orf169   | EGLN1      | HACL1    | LRRC37A2     | PDHX       | SAFB       | TRAF1     |          |
| CACNB2     | EML4       | HDAC5    | LRRC37A6P    | PGM3       | SBF1       | TRIM7     |          |
| CALB1      | ENTPD3     | HECTD1   | LYG2         | PIGZ       | SEC13      | TSC1      |          |
| CAMK1      | ERCC6L     | HEXA-AS1 | MARCH1       | PLEKHB1    | SENCR      | TTPAL     |          |

**Supplement 8. Gene list 2.** List of genes in module DGM-17.

|          |              |            |             |
|----------|--------------|------------|-------------|
| ACO2     | FYTTD1       | MAGI3      | SMC5        |
| ACSBG1   | HIAT1        | MAN2A1     | SMIM19      |
| ADD3-AS1 | HYAL1        | MBNL1-AS1  | SNRK-AS1    |
| AGA      | IFIT1        | MIR6126    | SNX17       |
| ANAPC10  | IPO9-AS1     | MLX        | SRRD        |
| ANKRD12  | IQCH-AS1     | MTOR-AS1   | STXBP5-AS1  |
| ATG7     | ITGAM        | MYH11      | SUV39H2     |
| B3GALNT2 | JADE1        | NPC1       | TBCK        |
| C1orf122 | KANSL1L      | NRG4       | TCF7L2      |
| C21orf33 | KIAA1524     | NUP214     | TCHP        |
| C9orf163 | KLF3-AS1     | OPRM1      | TMEM66      |
| CABLES1  | LIMD1-AS1    | OTUD5      | TNFAIP1     |
| CASC1    | LNX1         | PERM1      | TPI1        |
| CCDC176  | LOC100128494 | PIAS3      | TRAF3IP1    |
| CCNL1    | LOC100130093 | PMPCB      | TSC22D1-AS1 |
| CD81-AS1 | LOC100287944 | PPP3CB     | TSFM        |
| CEBPZ    | LOC100289511 | PRNCR1     | TUBG1       |
| CGGBP1   | LOC100506551 | PSIP1      | UBC         |
| DCBLD1   | LOC101926895 | PTOV1-AS1  | VRK2        |
| DDIT3    | LOC101927151 | RSPH4A     | YARS        |
| DHFRL1   | LOC101927497 | RUNX2      | ZBTB10      |
| DHRS4    | LOC101927770 | S100A13    | ZCCHC3      |
| DNAJB1   | LOC101928243 | SERHL      | ZNF789      |
| EIF3J    | LOC101928371 | SETD6      | ZNF839      |
| ENO4     | LOC101929162 | SH3BP5-AS1 | ZSCAN2      |
| FAM216A  | LOC646719    | SLC20A2    |             |
| FBXO8    | LOC730183    | SLC25A5    |             |
| FSD2     | LYSMD1       | SLC4A1AP   |             |

**Supplement 9. Table S1.** Reactome results of pathways involved in all modules with Reactome-FDR  $q$ -value  $< 0.05$ . Original and adjusted  $p$ -values are computed from the linear regression of MADRS score on module enrichment profile as described in main paper's Methods section. Modules are ordered by the significance of association with MADRS. Pathways with NA indicates no pathway enrichment found for that gene module.

\*For the purpose of exploration, the Reactome's enrichment FDR  $q$ -value threshold for DGM-5 and DGM-17 is increased to 0.2. The enrichment of the Apoptosis pathway in DGM-5 may suggest a genetic signature involving brain region-specific volume reduction due to cell loss in MDD<sup>13,14</sup>. The enriched PI3K/AKT activation pathway is also involved in apoptosis and plays a role in mRNA translation of type I interferon-dependent genes<sup>15</sup>.

|    | Module         | $p$ -value     | $p$ .adjust  | # genes    | Pathways involved                                                                                                                                                                                                                                                                                                                                                                                                                                                                                                                                                                            |
|----|----------------|----------------|--------------|------------|----------------------------------------------------------------------------------------------------------------------------------------------------------------------------------------------------------------------------------------------------------------------------------------------------------------------------------------------------------------------------------------------------------------------------------------------------------------------------------------------------------------------------------------------------------------------------------------------|
| 1  | <b>DGM-17*</b> | <b>6.16-05</b> | <b>0.002</b> | <b>109</b> | <ul style="list-style-type: none"> <li>• Interactions of Vpr with host cellular proteins</li> </ul>                                                                                                                                                                                                                                                                                                                                                                                                                                                                                          |
| 2  | <b>DGM-5*</b>  | <b>0.002</b>   | <b>0.016</b> | <b>291</b> | <ul style="list-style-type: none"> <li>• Apoptosis</li> <li>• Signaling by B Cell Receptor</li> <li>• PIP3/AKT and PI3K/AKT signaling activation</li> <li>• GAB1 signalosome</li> <li>• PI3K events in ERBB4 and ERBB2 signaling</li> <li>• tRNA Aminoacylation</li> <li>• AKT phosphorylates targets in the cytosol</li> </ul>                                                                                                                                                                                                                                                              |
| 3  | DGM-16         | 0.011          | 0.085        | 271        | <ul style="list-style-type: none"> <li>• Metabolism of lipids and lipoproteins</li> <li>• Immune System</li> <li>• Phospholipid metabolism</li> <li>• Developmental Biology</li> </ul>                                                                                                                                                                                                                                                                                                                                                                                                       |
| 4  | DGM-4          | 0.024          | 0.134        | 282        | NA                                                                                                                                                                                                                                                                                                                                                                                                                                                                                                                                                                                           |
| 5  | DGM-20         | 0.029          | 0.134        | 176        | <ul style="list-style-type: none"> <li>• The citric acid (TCA) cycle and respiratory electron transport</li> <li>• Formation of transcription-coupled NER (TC-NER) repair complex</li> </ul>                                                                                                                                                                                                                                                                                                                                                                                                 |
| 6  | DGM-23         | 0.039          | 0.143        | 110        | <ul style="list-style-type: none"> <li>• Activation of the AP-1 family of transcription factors</li> <li>• DSCAM interactions</li> </ul>                                                                                                                                                                                                                                                                                                                                                                                                                                                     |
| 7  | DGM-13         | 0.044          | 0.143        | 134        | <ul style="list-style-type: none"> <li>• Axon guidance</li> <li>• Developmental Biology</li> </ul>                                                                                                                                                                                                                                                                                                                                                                                                                                                                                           |
| 8  | DGM-11         | 0.063          | 0.181        | 133        | NA                                                                                                                                                                                                                                                                                                                                                                                                                                                                                                                                                                                           |
| 9  | DGM-14         | 0.093          | 0.234        | 164        | <ul style="list-style-type: none"> <li>• NFkB and MAP kinases activation mediated by TLR4 signaling repertoire</li> <li>• TRIF mediated TLR3 signaling</li> <li>• TRAF6 mediated induction of NFkB and MAP kinases upon TLR7/8 or 9 activation</li> <li>• MyD88:Mal cascade initiated on plasma membrane</li> <li>• Activated TLR4 signaling</li> <li>• Fatty acid, triacylglycerol, and ketone body metabolism</li> <li>• Metabolism of lipids and lipoproteins</li> <li>• Toll Receptor Cascades</li> <li>• Signaling by NGF</li> <li>• Pre-NOTCH Transcription and Translation</li> </ul> |
| 10 | DGM-3          | 0.102          | 0.234        | 746        | <ul style="list-style-type: none"> <li>• Adaptive Immune System</li> <li>• Downstream Signaling Events Of B Cell Receptor</li> </ul>                                                                                                                                                                                                                                                                                                                                                                                                                                                         |

|    |        |       |       |     |                                                                                                                                                                                                                                                                                                                                                                                                                                                                                                                                                   |
|----|--------|-------|-------|-----|---------------------------------------------------------------------------------------------------------------------------------------------------------------------------------------------------------------------------------------------------------------------------------------------------------------------------------------------------------------------------------------------------------------------------------------------------------------------------------------------------------------------------------------------------|
|    |        |       |       |     | <ul style="list-style-type: none"> <li>• Immune System</li> <li>• Signaling by the B Cell Receptor (BCR)</li> <li>• Processing of Capped Intronless Pre-mRNA</li> <li>• GAB1 signalosome</li> <li>• Processing of Intronless Pre-mRNAs</li> <li>• Signaling by PDGF</li> <li>• RNA Polymerase II Transcription</li> <li>• Cleavage of Growing Transcript in the Termination Region</li> </ul>                                                                                                                                                     |
| 11 | DGM-12 | 0.183 | 0.383 | 704 | <ul style="list-style-type: none"> <li>• Hemostasis</li> <li>• Platelet activation, signaling and aggregation</li> <li>• Signalling by NGF</li> <li>• Metabolism of proteins</li> <li>• G alpha (12/13) signalling events</li> <li>• Integration of energy metabolism</li> <li>• Platelet homeostasis</li> <li>• Pre-NOTCH Expression and Processing</li> <li>• p75 NTR receptor-mediated signalling</li> <li>• Signaling by Rho GTPases</li> </ul>                                                                                               |
| 12 | DGM-7  | 0.262 | 0.503 | 187 | NA                                                                                                                                                                                                                                                                                                                                                                                                                                                                                                                                                |
| 13 | DGM-8  | 0.365 | 0.646 | 525 | <ul style="list-style-type: none"> <li>• mRNA Splicing</li> <li>• mRNA Processing</li> <li>• Immune System</li> <li>• Processing of Capped Intron-Containing Pre-mRNA</li> <li>• Genes involved in Translation</li> <li>• Metabolism of proteins</li> <li>• Metabolism of mRNA</li> <li>• Metabolism of RNA</li> <li>• Adaptive Immune System</li> <li>• 3' -UTR-mediated translational regulation</li> </ul>                                                                                                                                     |
| 14 | DGM-9  | 0.469 | 0.647 | 157 | <ul style="list-style-type: none"> <li>• RNA Polymerase II Pre-transcription Events</li> <li>• Abortive elongation of HIV-1 transcript in the absence of Tat</li> <li>• MicroRNA (miRNA) Biogenesis</li> <li>• Regulatory RNA pathways</li> <li>• Immune System</li> <li>• Elongation arrest and recovery</li> <li>• Formation of the HIV-1 Early Elongation Complex</li> <li>• RNA Polymerase II Transcription Pre-Initiation And Promoter Opening</li> <li>• Late Phase of HIV Life Cycle</li> <li>• RNA Polymerase II Transcription</li> </ul> |
| 15 | DGM-22 | 0.483 | 0.647 | 165 | <ul style="list-style-type: none"> <li>• Developmental Biology</li> <li>• Transcriptional Regulation of White Adipocyte Differentiation</li> <li>• Immune System</li> </ul>                                                                                                                                                                                                                                                                                                                                                                       |
| 16 | DGM-19 | 0.515 | 0.647 | 146 | <ul style="list-style-type: none"> <li>• Immune System</li> <li>• Myogenesis</li> <li>• Adaptive Immune System</li> <li>• Metabolism of carbohydrates</li> <li>• Class I MHC mediated antigen processing &amp; presentation</li> </ul>                                                                                                                                                                                                                                                                                                            |

|    |        |       |       |     |                                                                                                                                                                                                                                                                                                                                                                                                                        |
|----|--------|-------|-------|-----|------------------------------------------------------------------------------------------------------------------------------------------------------------------------------------------------------------------------------------------------------------------------------------------------------------------------------------------------------------------------------------------------------------------------|
|    |        |       |       |     | <ul style="list-style-type: none"> <li>• Inflammasomes</li> <li>• Signaling by TGF-beta Receptor Complex</li> <li>• Platelet activation, signaling and aggregation</li> <li>• Antigen processing-Cross presentation</li> <li>• Response to elevated platelet cytosolic Ca<sup>2+</sup></li> </ul>                                                                                                                      |
| 17 | DGM-21 | 0.520 | 0.647 | 99  | NA                                                                                                                                                                                                                                                                                                                                                                                                                     |
| 18 | DGM-6  | 0.523 | 0.647 | 442 | <ul style="list-style-type: none"> <li>• Immune System</li> <li>• Metabolism of RNA</li> <li>• Metabolism of mRNA</li> <li>• Metabolism of proteins</li> <li>• Influenza Life Cycle</li> <li>• Adaptive Immune System</li> <li>• Influenza Viral RNA Transcription and Replication</li> <li>• Interleukin-2 signaling</li> <li>• Hemostasis</li> <li>• HIV Infection</li> </ul>                                        |
| 19 | DGM-18 | 0.534 | 0.647 | 184 | NA                                                                                                                                                                                                                                                                                                                                                                                                                     |
| 20 | DGM-2  | 0.579 | 0.666 | 207 | <ul style="list-style-type: none"> <li>• Signalling by NGF</li> <li>• SLC-mediated transmembrane transport</li> <li>• PKB-mediated events</li> <li>• Interactions of Vpr with host cellular proteins</li> <li>• p75 NTR receptor-mediated signalling</li> </ul>                                                                                                                                                        |
| 21 | DGM-1  | 0.639 | 0.700 | 470 | <ul style="list-style-type: none"> <li>• Adaptive Immune System</li> <li>• Immune System</li> <li>• Cell Cycle, Mitotic</li> <li>• MHC class II antigen presentation</li> <li>• Cytokine Signaling in Immune system</li> <li>• Cell Cycle</li> <li>• Developmental Biology</li> <li>• DNA Replication</li> <li>• Interferon Signaling</li> <li>• Class I MHC mediated antigen processing &amp; presentation</li> </ul> |
| 22 | DGM-15 | 0.705 | 0.737 | 86  | NA                                                                                                                                                                                                                                                                                                                                                                                                                     |
| 23 | DGM-10 | 0.948 | 0.948 | 124 | NA                                                                                                                                                                                                                                                                                                                                                                                                                     |

**Supplement 10. Table S2.** Main effect enrichment of genes in each module. The module dimensionality reduction or feature selection approach is effective at identifying modules that are enriched for individual genes that are statistically significant. The last column gives the probability of observing at least  $x_i$  genes from module  $i$  in the 100 most significant genes (based on  $p$ -values of the logistic regression on clinical phenotype as described in main text) assuming a hypergeometric distribution, taking into account the number of genes in module  $i$ . These probability values correlate with the MADRS-significant  $p$ -value of each module shown in Supplement 8 ( $r = 0.9$ ).

| DGM- ( $i$ ) | $x_i$ (# sig. genes) | $P(X \geq x_i)$ |
|--------------|----------------------|-----------------|
| <b>5</b>     | <b>26</b>            | <b>8.62e-13</b> |
| 16           | 17                   | 2.25e-06        |
| <b>17</b>    | <b>8</b>             | <b>4.70e-04</b> |
| 13           | 8                    | 1.82e-03        |
| 20           | 6                    | 7.69e-02        |
| 4            | 8                    | 1.03e-01        |
| 23           | 3                    | 2.85e-01        |
| 14           | 3                    | 5.28e-01        |
| 9            | 2                    | 7.50e-01        |
| 12           | 9                    | 8.57e-01        |
| 3            | 7                    | 9.76e-01        |
| 1            | 2                    | 9.98e-01        |
| 6            | 1                    | 1.00e+00        |
| 2            | 0                    | 1.00e+00        |
| 7            | 0                    | 1.00e+00        |
| 8            | 0                    | 1.00e+00        |
| 10           | 0                    | 1.00e+00        |
| 11           | 0                    | 1.00e+00        |
| 15           | 0                    | 1.00e+00        |
| 18           | 0                    | 1.00e+00        |
| 19           | 0                    | 1.00e+00        |
| 21           | 0                    | 1.00e+00        |
| 22           | 0                    | 1.00e+00        |

**Supplement 11. Gene list 3.** Top 100 individual genes with statistically significant association with the diagnostic phenotype (MDD/HC).

|              |              |              |              |              |
|--------------|--------------|--------------|--------------|--------------|
| FAM13A       | LOC100506314 | EFCAB14-AS1  | WDR90        | PAXBP1       |
| MCM3AP-AS1   | FGD1         | PSMB7        | CCDC65       | CP           |
| PP7080       | AP1G2        | RNF167       | LOC101926895 | LRRN2        |
| NR2C2        | MRPS25       | RGL4         | TYW1         | MAK          |
| OXR1         | SDCBP2-AS1   | C1RL-AS1     | FAM168A      | GJD3         |
| PSMD5        | KIAA1656     | MYCBP2-AS1   | SLC9A7       | SPTY2D1-AS1  |
| CHKA         | HBP1         | AGAP2        | GZF1         | COA5         |
| XRCC3        | FAN1         | ACO2         | MIR3661      | NOP16        |
| PEX1         | CCNI2        | C19orf71     | MIR324       | ZFP36L1      |
| DGCR9        | MIPEPP3      | KIAA0100     | UCHL5        | LOC101926943 |
| NEIL1        | PHOSPHO1     | PDCD2        | RNF219-AS1   | SARNP        |
| DND1         | STARD9       | OXA1L        | EZR-AS1      | SLC34A3      |
| EIF2D        | FAM184B      | LOC101928371 | MAP3K13      | PKD2L2       |
| ATP5J        | FDPS         | TCF7L1       | SLC13A4      | PIIB         |
| TMEM140      | CEBPZ        | LOC100379224 | PGM3         | TXLNA        |
| MBNL1-AS1    | MASP2        | TRMT1        | TAC4         | TAP1         |
| USP34        | FOXH1        | ATP1A1-AS1   | CTSB         | STXBP5-AS1   |
| LOC101928243 | TFPT         | LINC00854    | TSSK3        | SENCR        |
| ANAPC10      | PAXBP1-AS1   | JUN          | LOC100129931 | BMP8A        |
| NSA2         | EFCAB10      | MMP19        | KRTCAP3      | MXRA8        |

**Supplement 12. Figure S4.** (Extension of main paper's Fig. 3) Relationship between the individual gene's importance score and centrality in each module. The modules are ranked from most important (top left) to least important (bottom right). The exact correlation values are given in Supplement 8.

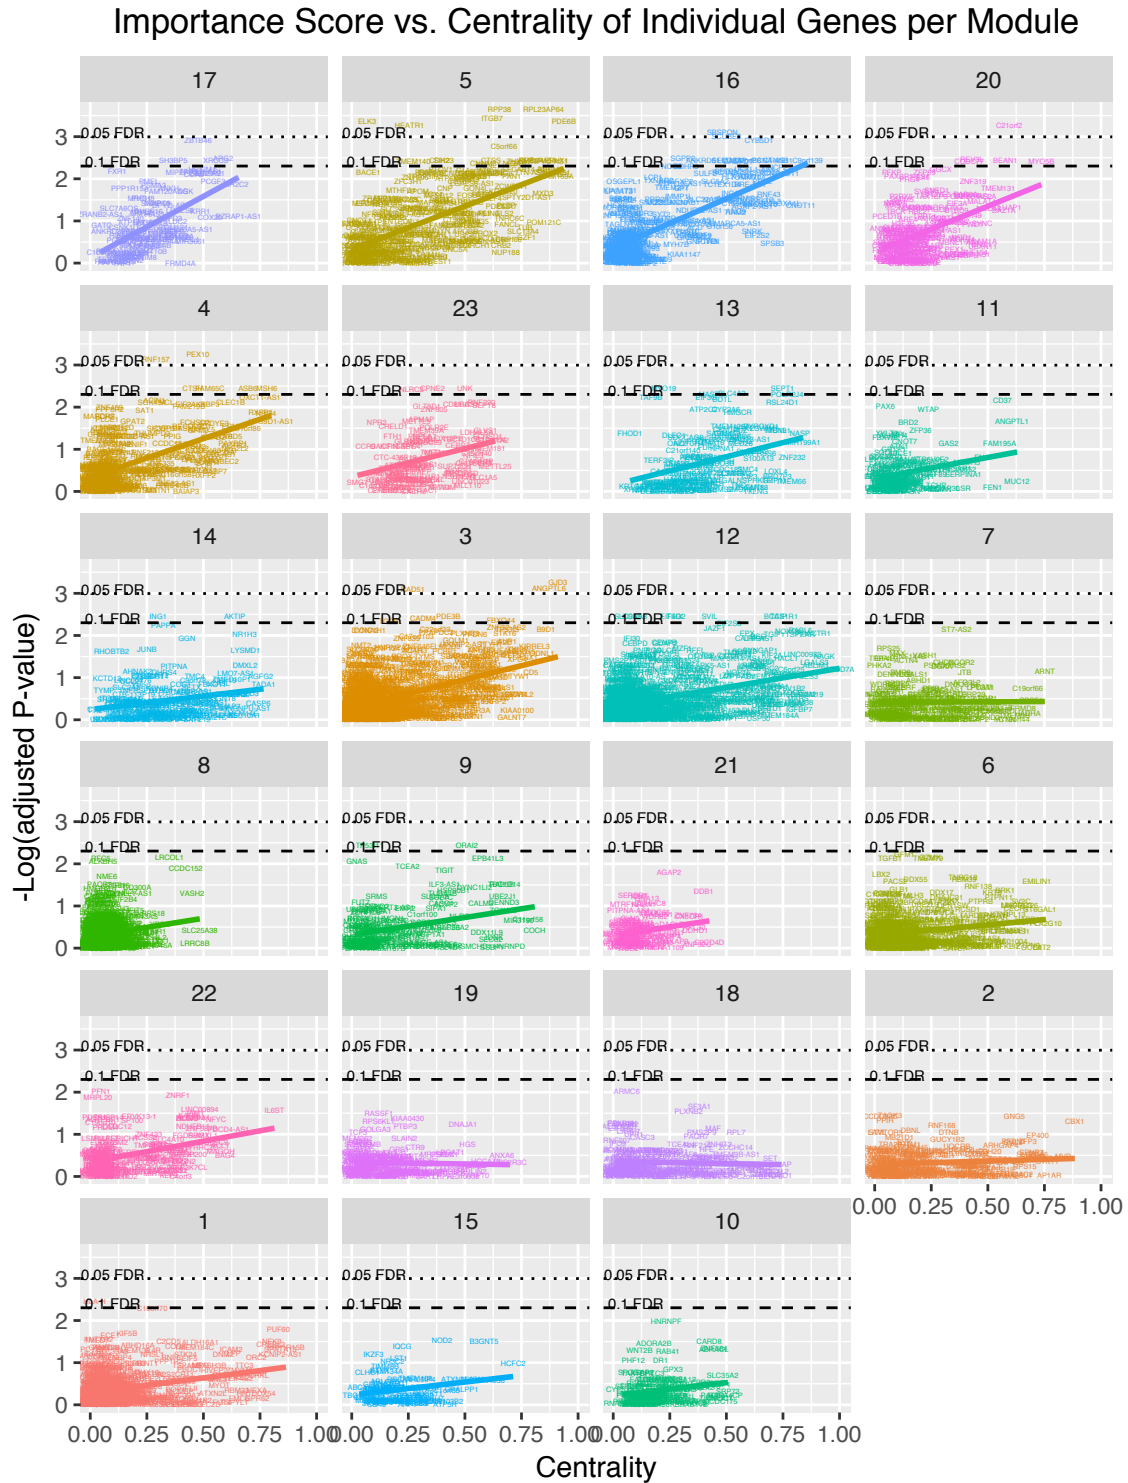



**Supplement 13. Table S3.** Summary statistics of linear regression models for each module in which the importance scores of genes in the module are regressed on the centrality scores of genes in the module.

| DGM- | $\beta$ coefficients | R <sup>2</sup> | p-value  |
|------|----------------------|----------------|----------|
| 17   | 0.925                | 0.137          | 2.17E-04 |
| 5    | 0.675                | 0.190          | 2.44E-14 |
| 16   | 0.944                | 0.307          | 2.76E-22 |
| 20   | 0.682                | 0.093          | 4.81E-05 |
| 4    | 0.572                | 0.111          | 2.58E-08 |
| 23   | 0.364                | 0.033          | 0.066    |
| 13   | 0.515                | 0.085          | 0.001    |
| 11   | 0.513                | 0.047          | 0.015    |
| 14   | 0.315                | 0.045          | 0.008    |
| 3    | 0.350                | 0.064          | 6.81E-12 |
| 12   | 0.321                | 0.068          | 5.75E-12 |
| 7    | -0.164               | 0.013          | 0.123    |
| 8    | 0.069                | 0.000          | 0.645    |
| 9    | 0.327                | 0.058          | 0.003    |
| 21   | -0.053               | 0.001          | 0.822    |
| 6    | -0.024               | 0.000          | 0.701    |
| 22   | 0.176                | 0.012          | 0.170    |
| 19   | -0.164               | 0.016          | 0.126    |
| 18   | -0.081               | 0.006          | 0.321    |
| 2    | -0.021               | 0.000          | 0.757    |
| 1    | 0.298                | 0.047          | 2.44E-06 |
| 15   | 0.253                | 0.015          | 0.288    |
| 10   | 0.140                | 0.008          | 0.338    |

**Supplement 14. Table S4. Interactions between these 14 differential genes and other MDD-related genes.**

Our secondary analyses with the conventional logistic regressions of the diagnosis phenotype on individual genes revealed 14 significant effects with FDR threshold of 0.05: MBNL1-AS1, LOC101928243, ANAPC10, LOC101928371, LOC101926895, JADE1, STXBP5-AS1, ADD3-AS1, ACO2, CEBPZ, PRNCR1, FAM13A, MCM3AP-AS1, PP7080, NR2C2, USP34, MMP19, TFPT and TCF7L1. Although no previous MDD associations have been reported for these genes, there is evidence for functional interactions between these genes and known MDD-related genes ([www.genecards.org](http://www.genecards.org)). For example, the XRCC3 gene interacts with the CREB1 gene (discussed above) and FKBP5 gene whose association with MDD has been strongly suggested<sup>16-21</sup>. A comprehensive list of interactions between these 14 differential genes and other MDD-related genes is provided in the Supplementary file *InteractingGenes.pdf*. We note that an important paralog of FKBP5, FKBP4, participates in module DGM-5. Moreover, several genes in the two modules are associated with schizophrenia, such as the critical mediator of growth factor-induced neuronal survival AKT1<sup>22-24</sup> (in DGM-5), VRK2 (in DGM-17) which codes for a serine/threonine kinase of the casein kinase I group<sup>25-27</sup>, and TCF7L2 (in DGM-17), a component of the Wnt signaling pathway<sup>28</sup>. Our finding of several schizophrenia-related genes in our MDD analysis is not surprising due to the pleiotropy observed across psychiatric disorders, as symptom complexes such as anhedonia and psychosis can be shared across these disorders. Also, markers near AKT1 have been connected to depression in different populations<sup>29</sup>, and TCF7L2 contains genetic variants that putatively influence MDD susceptibility<sup>30</sup>. AKT is also a critical mediator of growth factor-induced neuronal survival of which pathways significantly associated with different psychiatric disorders<sup>31</sup>.

# VarElect - Indirect Results

Prepared for: Trang Le (trang-le+outis@utulsa.edu)

Date: 6/7/2017

Copyright © LifeMap Sciences, Inc.

## Results

| Implicate<br>d Symbol | Implicating<br>Symbol | Description                                   | Category       | GIFTs | Matched<br>Phenotypes | Mat<br>ched<br>Phe<br>noty | Global<br>Rank<br>(Total<br>Genes) | Implicated Ge             | Implicating Ge             |
|-----------------------|-----------------------|-----------------------------------------------|----------------|-------|-----------------------|----------------------------|------------------------------------|---------------------------|----------------------------|
|                       |                       |                                               |                |       |                       |                            |                                    | Score<br>(Implica<br>ted) | Score<br>(Implicati<br>ng) |
| XRCC3                 | NR3C1                 | Nuclear Receptor Subfamily 3 Group C Member 1 | Protein Coding | 76    | "major depressive"    | 1                          | 11                                 | <b>3.25</b>               | 2.48                       |
| XRCC3                 | FKBP5                 | FK506 Binding Protein 5                       | Protein Coding | 64    | "major depressive"    | 1                          | 4                                  | <b>3.25</b>               | 1                          |
| XRCC3                 | EP300                 | E1A Binding Protein P300                      | Protein Coding | 74    | "major depressive"    | 1                          | 24                                 | <b>3.25</b>               | 0.69                       |
| XRCC3                 | MTHFR                 | Methylenetetrahydrofolate Reductase           | Protein Coding | 66    | "major depressive"    | 1                          | 31                                 | <b>3.25</b>               | 0.64                       |
| XRCC3                 | CREB1                 | CAMP Responsive Element Binding Protein 1     | Protein Coding | 72    | "major depressive"    | 1                          | 28                                 | <b>3.25</b>               | 0.31                       |
| ACO2                  | NR3C1                 | Nuclear Receptor Subfamily 3 Group C Member 1 | Protein Coding | 76    | "major depressive"    | 1                          | 11                                 | <b>3.20</b>               | 2.39                       |
| ACO2                  | TPH2                  | Tryptophan Hydroxylase 2                      | Protein Coding | 69    | "major depressive"    | 1                          | 1                                  | <b>3.20</b>               | 1.07                       |
| ACO2                  | POMC                  | Proopiomelanocortin                           | Protein Coding | 72    | "major depressive"    | 1                          | 14                                 | <b>3.20</b>               | 0.65                       |
| ACO2                  | BDNF                  | Brain Derived Neurotrophic Factor             | Protein Coding | 73    | "major depressive"    | 1                          | 6                                  | <b>3.20</b>               | 0.62                       |
| ACO2                  | EP300                 | E1A Binding Protein P300                      | Protein Coding | 74    | "major depressive"    | 1                          | 24                                 | <b>3.20</b>               | 0.6                        |
| NR2C2                 | NR3C1                 | Nuclear Receptor Subfamily 3 Group C Member 1 | Protein Coding | 76    | "major depressive"    | 1                          | 11                                 | <b>2.98</b>               | 1.74                       |
| NR2C2                 | NR1D1                 | Nuclear Receptor Subfamily 1 Group D Member 1 | Protein Coding | 69    | "major depressive"    | 1                          | 21                                 | <b>2.98</b>               | 1.5                        |
| NR2C2                 | FKBP5                 | FK506 Binding Protein 5                       | Protein Coding | 64    | "major depressive"    | 1                          | 4                                  | <b>2.98</b>               | 1.23                       |
| NR2C2                 | EP300                 | E1A Binding Protein P300                      | Protein Coding | 74    | "major depressive"    | 1                          | 24                                 | <b>2.98</b>               | 1.23                       |
| NR2C2                 | ESR1                  | Estrogen Receptor 1                           | Protein Coding | 82    | "major depressive"    | 1                          | 52                                 | <b>2.98</b>               | 0.42                       |
| TCF7L1                | EP300                 | E1A Binding Protein P300                      | Protein Coding | 74    | "major depressive"    | 1                          | 24                                 | <b>2.75</b>               | 1.81                       |
| TCF7L1                | GSK3B                 | Glycogen Synthase Kinase 3 Beta               | Protein Coding | 74    | "major depressive"    | 1                          | 30                                 | <b>2.75</b>               | 1.06                       |
| TCF7L1                | HTR2A                 | 5-Hydroxytryptamine Receptor 2A               | Protein Coding | 69    | "major depressive"    | 1                          | 2                                  | <b>2.75</b>               | 1.03                       |
| TCF7L1                | BDNF                  | Brain Derived Neurotrophic Factor             | Protein Coding | 73    | "major depressive"    | 1                          | 6                                  | <b>2.75</b>               | 0.89                       |
| TCF7L1                | FKBP5                 | FK506 Binding Protein 5                       | Protein Coding | 64    | "major depressive"    | 1                          | 4                                  | <b>2.75</b>               | 0.78                       |
| ANAPC10               | EP300                 | E1A Binding Protein P300                      | Protein Coding | 74    | "major depressive"    | 1                          | 24                                 | <b>2.12</b>               | 1.41                       |
| ANAPC10               | BDNF                  | Brain Derived Neurotrophic Factor             | Protein Coding | 73    | "major depressive"    | 1                          | 6                                  | <b>2.12</b>               | 0.88                       |
| ANAPC10               | GSK3B                 | Glycogen Synthase Kinase 3 Beta               | Protein Coding | 74    | "major depressive"    | 1                          | 30                                 | <b>2.12</b>               | 0.66                       |

|         |        |                                               |                |    |                    |   |    |             |      |
|---------|--------|-----------------------------------------------|----------------|----|--------------------|---|----|-------------|------|
| ANAPC10 | CREB1  | CAMP Responsive Element Binding Protein 1     | Protein Coding | 72 | "major depressive" | 1 | 28 | <b>2.12</b> | 0.58 |
| ANAPC10 | PRL    | Prolactin                                     | Protein Coding | 64 | "major depressive" | 1 | 8  | <b>2.12</b> | 0.53 |
| USP34   | HTR2A  | 5-Hydroxytryptamine Receptor 2A               | Protein Coding | 69 | "major depressive" | 1 | 2  | <b>1.64</b> | 1.03 |
| USP34   | EP300  | E1A Binding Protein P300                      | Protein Coding | 74 | "major depressive" | 1 | 24 | <b>1.64</b> | 0.7  |
| USP34   | POMC   | Proopiomelanocortin                           | Protein Coding | 72 | "major depressive" | 1 | 14 | <b>1.64</b> | 0.65 |
| USP34   | HTR1A  | 5-Hydroxytryptamine Receptor 1A               | Protein Coding | 67 | "major depressive" | 1 | 7  | <b>1.64</b> | 0.57 |
| USP34   | PRL    | Prolactin                                     | Protein Coding | 64 | "major depressive" | 1 | 8  | <b>1.64</b> | 0.54 |
| FAM13A  | HTR2A  | 5-Hydroxytryptamine Receptor 2A               | Protein Coding | 69 | "major depressive" | 1 | 2  | <b>1.63</b> | 1.09 |
| FAM13A  | HTR1A  | 5-Hydroxytryptamine Receptor 1A               | Protein Coding | 67 | "major depressive" | 1 | 7  | <b>1.63</b> | 0.61 |
| FAM13A  | NR3C1  | Nuclear Receptor Subfamily 3 Group C Member 1 | Protein Coding | 76 | "major depressive" | 1 | 11 | <b>1.63</b> | 0.53 |
| FAM13A  | CRH    | Corticotropin Releasing Hormone               | Protein Coding | 64 | "major depressive" | 1 | 12 | <b>1.63</b> | 0.52 |
| FAM13A  | CHRM2  | Cholinergic Receptor Muscarinic 2             | Protein Coding | 72 | "major depressive" | 1 | 13 | <b>1.63</b> | 0.5  |
| JADE1   | EP300  | E1A Binding Protein P300                      | Protein Coding | 74 | "major depressive" | 1 | 24 | <b>1.40</b> | 1.3  |
| JADE1   | CREBBP | CREB Binding Protein                          | Protein Coding | 73 | "major depressive" | 1 | 56 | <b>1.40</b> | 0.12 |
| JADE1   | PBRM1  | Polybromo 1                                   | Protein Coding | 65 | "major depressive" | 1 | 56 | <b>1.40</b> | 0.1  |
| JADE1   | CLOCK  | Clock Circadian Regulator                     | Protein Coding | 64 | "major depressive" | 1 | 53 | <b>1.40</b> | 0.1  |
| JADE1   | AR     | Androgen Receptor                             | Protein Coding | 79 | "major depressive" | 1 | 54 | <b>1.40</b> | 0.09 |
| CEBPZ   | EP300  | E1A Binding Protein P300                      | Protein Coding | 74 | "major depressive" | 1 | 24 | <b>1.39</b> | 1.08 |
| CEBPZ   | GSK3B  | Glycogen Synthase Kinase 3 Beta               | Protein Coding | 74 | "major depressive" | 1 | 30 | <b>1.39</b> | 0.42 |
| CEBPZ   | TP53   | Tumor Protein P53                             | Protein Coding | 79 | "major depressive" | 1 | 56 | <b>1.39</b> | 0.3  |
| CEBPZ   | CUX1   | Cut Like Homeobox 1                           | Protein Coding | 59 | "major depressive" | 1 | 56 | <b>1.39</b> | 0.15 |
| CEBPZ   | NVL    | Nuclear VCP-Like                              | Protein Coding | 55 | "major depressive" | 1 | 55 | <b>1.39</b> | 0.09 |
| TFPT    | EP300  | E1A Binding Protein P300                      | Protein Coding | 74 | "major depressive" | 1 | 24 | <b>1.35</b> | 0.84 |
| TFPT    | PRL    | Prolactin                                     | Protein Coding | 64 | "major depressive" | 1 | 8  | <b>1.35</b> | 0.58 |
| TFPT    | GATA3  | GATA Binding Protein 3                        | Protein Coding | 70 | "major depressive" | 1 | 24 | <b>1.35</b> | 0.53 |
| TFPT    | POMC   | Proopiomelanocortin                           | Protein Coding | 72 | "major depressive" | 1 | 14 | <b>1.35</b> | 0.5  |
| TFPT    | XBP1   | X-Box Binding Protein 1                       | Protein Coding | 66 | "major depressive" | 1 | 19 | <b>1.35</b> | 0.45 |
| MMP19   | BDNF   | Brain Derived Neurotrophic Factor             | Protein Coding | 73 | "major depressive" | 1 | 6  | <b>1.24</b> | 0.76 |
| MMP19   | HAPLN1 | Hyaluronan And Proteoglycan Link Protein 1    | Protein Coding | 59 | "major depressive" | 1 | 24 | <b>1.24</b> | 0.6  |
| MMP19   | EP300  | E1A Binding Protein P300                      | Protein Coding | 74 | "major depressive" | 1 | 24 | <b>1.24</b> | 0.43 |
| MMP19   | CREB1  | CAMP Responsive Element Binding Protein 1     | Protein Coding | 72 | "major depressive" | 1 | 28 | <b>1.24</b> | 0.38 |
| MMP19   | IL10   | Interleukin 10                                | Protein Coding | 70 | "major depressive" | 1 | 51 | <b>1.24</b> | 0.36 |

## References

1. Kalari KR, Nair AA, Bhavsar JD, O'Brien DR, Davila JI, Bockol MA, *et al.* MAP-RSeq: Mayo Analysis Pipeline for RNA sequencing. *BMC bioinformatics* 2014; **15**: 224.
2. Hansen KD, Irizarry RA, Wu Z. Removing technical variability in RNA-seq data using conditional quantile normalization. *Biostatistics* 2012; **13**(2): 204-216.
3. Bullard JH, Purdom E, Hansen KD, Dudoit S. Evaluation of statistical methods for normalization and differential expression in mRNA-Seq experiments. *BMC Bioinformatics* 2010; **11**: 94.
4. Robinson MD, Oshlack A. A scaling normalization method for differential expression analysis of RNA-seq data. *Genome biology* 2010; **11**(3): R25.
5. Robinson MD, McCarthy DJ, Smyth GK. edgeR: a Bioconductor package for differential expression analysis of digital gene expression data. *Bioinformatics* 2010; **26**(1): 139-140.
6. Kriegel H-P, Schubert M, Zimek A. Angle-Based Outlier Detection in High-dimensional Data. *Proceedings of the 14th ACM SIGKDD international conference on Knowledge discovery and data mining* 2008: 444-452.
7. Aggarwal CC, Hinneburg A, Keim DA (2001). On the Surprising Behavior of Distance Metrics in High Dimensional Spaces. In: *Proceedings of the 8th International Conference on Database Theory*. Springer-Verlag. pp 420-434.
8. Leek JT, Storey JD. Capturing heterogeneity in gene expression studies by surrogate variable analysis. *PLoS genetics* 2007; **3**(9): 1724-1735.
9. Ritchie ME, Phipson B, Wu D, Hu Y, Law CW, Shi W, *et al.* limma powers differential expression analyses for RNA-sequencing and microarray studies. *Nucleic Acids Res* 2015; **43**(7): e47.
10. Nygaard V, Rodland EA, Hovig E. Methods that remove batch effects while retaining group differences may lead to exaggerated confidence in downstream analyses. *Biostatistics* 2016; **17**(1): 29-39.
11. McIntyre LM, Lopiano KK, Morse AM, Amin V, Oberg AL, Young LJ, *et al.* RNA-seq: technical variability and sampling. *BMC genomics* 2011; **12**: 293.
12. Hackstadt AJ, Hess AM. Filtering for increased power for microarray data analysis. *BMC Bioinformatics* 2009; **10**: 11.
13. McKinnon MC, Yucel K, Nazarov A, MacQueen GM. A meta-analysis examining clinical predictors of hippocampal volume in patients with major depressive disorder. *J Psychiatry Neurosci* 2009; **34**(1): 41-54.

14. Eilat E, Mendlovic S, Doron A, Zakuth V, Spirer Z. Increased apoptosis in patients with major depression: A preliminary study. *J Immunol* 1999; **163**(1): 533-534.
15. Kaur S, Sassano A, Dolniak B, Joshi S, Majchrzak-Kita B, Baker DP, *et al.* Role of the Akt pathway in mRNA translation of interferon-stimulated genes. *Proceedings of the National Academy of Sciences of the United States of America* 2008; **105**(12): 4808-4813.
16. Tatro ET, Everall IP, Kaul M, Achim CL. Modulation of glucocorticoid receptor nuclear translocation in neurons by immunophilins FKBP51 and FKBP52: implications for major depressive disorder. *Brain research* 2009; **1286**: 1-12.
17. Binder EB, Salyakina D, Lichtner P, Wochnik GM, Ising M, Putz B, *et al.* Polymorphisms in FKBP5 are associated with increased recurrence of depressive episodes and rapid response to antidepressant treatment. *Nat Genet* 2004; **36**(12): 1319-1325.
18. Ellsworth KA, Moon I, Eckloff BW, Fridley BL, Jenkins GD, Batzler A, *et al.* FKBP5 genetic variation: association with selective serotonin reuptake inhibitor treatment outcomes in major depressive disorder. *Pharmacogenetics and genomics* 2013; **23**(3): 156-166.
19. Scheuer S, Ising M, Uhr M, Otto Y, von Klitzing K, Klein AM. FKBP5 polymorphisms moderate the influence of adverse life events on the risk of anxiety and depressive disorders in preschool children. *Journal of psychiatric research* 2016; **72**: 30-36.
20. Lavebratt C, Aberg E, Sjöholm LK, Forsell Y. Variations in FKBP5 and BDNF genes are suggestively associated with depression in a Swedish population-based cohort. *Journal of affective disorders* 2010; **125**(1-3): 249-255.
21. Tatro ET, Everall IP, Masliah E, Hult BJ, Lucero G, Chana G, *et al.* Differential expression of immunophilins FKBP51 and FKBP52 in the frontal cortex of HIV-infected patients with major depressive disorder. *Journal of neuroimmune pharmacology : the official journal of the Society on NeuroImmune Pharmacology* 2009; **4**(2): 218-226.
22. Emamian ES, Hall D, Birnbaum MJ, Karayiorgou M, Gogos JA. Convergent evidence for impaired AKT1-GSK3beta signaling in schizophrenia. *Nat Genet* 2004; **36**(2): 131-137.
23. Mathur A, Law MH, Megson IL, Shaw DJ, Wei J. Genetic association of the AKT1 gene with schizophrenia in a British population. *Psychiatric genetics* 2010; **20**(3): 118-122.
24. Xu MQ, Xing QH, Zheng YL, Li S, Gao JJ, He G, *et al.* Association of AKT1 gene polymorphisms with risk of schizophrenia and with response to antipsychotics in the Chinese population. *The Journal of clinical psychiatry* 2007; **68**(9): 1358-1367.
25. Li M, Wang Y, Zheng XB, Ikeda M, Iwata N, Luo XJ, *et al.* Meta-analysis and brain imaging data support the involvement of VRK2 (rs2312147) in schizophrenia susceptibility. *Schizophrenia research* 2012; **142**(1-3): 200-205.

26. Schizophrenia Working Group of the Psychiatric Genomics C. Biological insights from 108 schizophrenia-associated genetic loci. *Nature* 2014; **511**(7510): 421-427.
27. Zhang B, Gao CY, Zhang HB, Yang B, Yin JF, Wei SG, *et al.* Association of the VRK2 gene rs3732136 polymorphism with schizophrenia in a Northwest Chinese Han population. *Genetics and molecular research : GMR* 2015; **14**(3): 9404-9411.
28. Stefansson H, Ophoff RA, Steinberg S, Andreassen OA, Cichon S, Rujescu D, *et al.* Common variants conferring risk of schizophrenia. *Nature* 2009; **460**(7256): 744-747.
29. Pereira PA, Bicalho MA, de Moraes EN, Malloy-Diniz L, Bozzi IC, Nicolato R, *et al.* Genetic variant of AKT1 and AKTIP associated with late-onset depression in a Brazilian population. *International journal of geriatric psychiatry* 2014; **29**(4): 399-405.
30. Inkster B, Nichols TE, Saemann PG, Auer DP, Holsboer F, Muglia P, *et al.* Pathway-based approaches to imaging genetics association studies: Wnt signaling, GSK3beta substrates and major depression. *NeuroImage* 2010; **53**(3): 908-917.
31. Network, Pathway Analysis Subgroup of the Psychiatric Genomics C. Corrigendum: Psychiatric genome-wide association study analyses implicate neuronal, immune and histone pathways. *Nat Neurosci* 2015; **18**(12): 1861.
